# Supplementary material for: The Structure of a Chondroitin Sulfate-binding Domain Important in Placental Malaria
Source: PubMed Central journal article supplement — J Biol Chem. 2008 Aug 8;283(32):21842–6. doi: 10.1074/jbc.C800086200 (PMC2494935; doi:10.1074/jbc.c800086200), 2008-08-08
Supplement: C800086200_1.pdf [file C800086200_1.pdf]

**Table I - Diffraction data collection statistics.**

|                        | Native      | Xenon       | Sulphate    | disaccharide |
|------------------------|-------------|-------------|-------------|--------------|
| Wavelength (Å)         | 1.54        | 2.29        | 0.979       | 0.979        |
| Range (Å)              | 22-2.2      | 35-3.0      | 63-1.8      | 93-2.0       |
| R <sub>mrg</sub> (%)   | 6.9 (44.8)  | 6.3 (16.9)  | 10.1 (79.1) | 7.6 (34.8)   |
| I/σ(I)                 | 14.6 (2.6)  | 25.3 (10.9) | 14.5 (2.2)  | 18.6 (5.4)   |
| Completeness           | 97.2 (92.8) | 97.7 (94.2) | 99.8 (100)  | 100 (100)    |
| Multiplicity           | 3.4 (3.4)   | 6.6 (6.5)   | 7.0 (7.1)   | 7.0 (7.2)    |
| Anomalous completeness |             | 96.3 (94.2) |             |              |
| Anomalous multiplicity |             | 3.6 (3.5)   |             |              |

**Table II - phasing statistics for MIRAS using native and Xenon derivative**

|                            |       |
|----------------------------|-------|
| Phasing power              |       |
| Isomorphous acentric       | 2.798 |
| Isomorphous centric        | 2.144 |
| Anomalous acentric         | 1.361 |
| Figure of merit - acentric | 0.194 |
| Figure of merit - centric  | 0.210 |

**Table III - X-ray refinement statistics**

|                                             | native    | Sulphate   | Disaccharide |
|---------------------------------------------|-----------|------------|--------------|
| Rmsd bond lengths (Å)                       | 0.006     | 0.009      | 0.010        |
| Rmsd bond angles (°)                        | 0.842     | 1.087      | 1.135        |
| Reflections used for refinement (work/free) | 16289/869 | 29784/1575 | 22216/1140   |
| R <sub>work</sub> (%)                       | 23.6      | 23.1       | 22.2         |
| R <sub>free</sub> (%)                       | 28.7      | 28.6       | 27.1         |
| No. of protein residues                     | 328       | 338        | 338          |
| No. of glycerols                            | 1         | 1          | 1            |
| No of waters                                | 282       | 233        | 262          |
| No of sulphates                             | 0         | 1          | 1            |
| Ramachandran plot                           |           |            |              |
| Allowed region (%)                          | 91.2      | 91.8       | 91.8         |
| Additional allowed region (%)               | 8.8       | 8.2        | 8.2          |
| Generously allowed region (%)               | 0         | 0          | 0            |
| Disallowed region (%)                       | 0         | 0          | 0            |
